# Supplementary figures and images for: Brite Adipocyte FGF21 Attenuates Cardiac Ischemia/Reperfusion Injury in Rat Hearts by Modulating NRF2
Source: MDPI journal article supplement (doi:10.3390/cells11030567), 2022-02-06

**Figure S1.** Heatmap of gene list for highlighted phenotype in gene set enrichment analysis

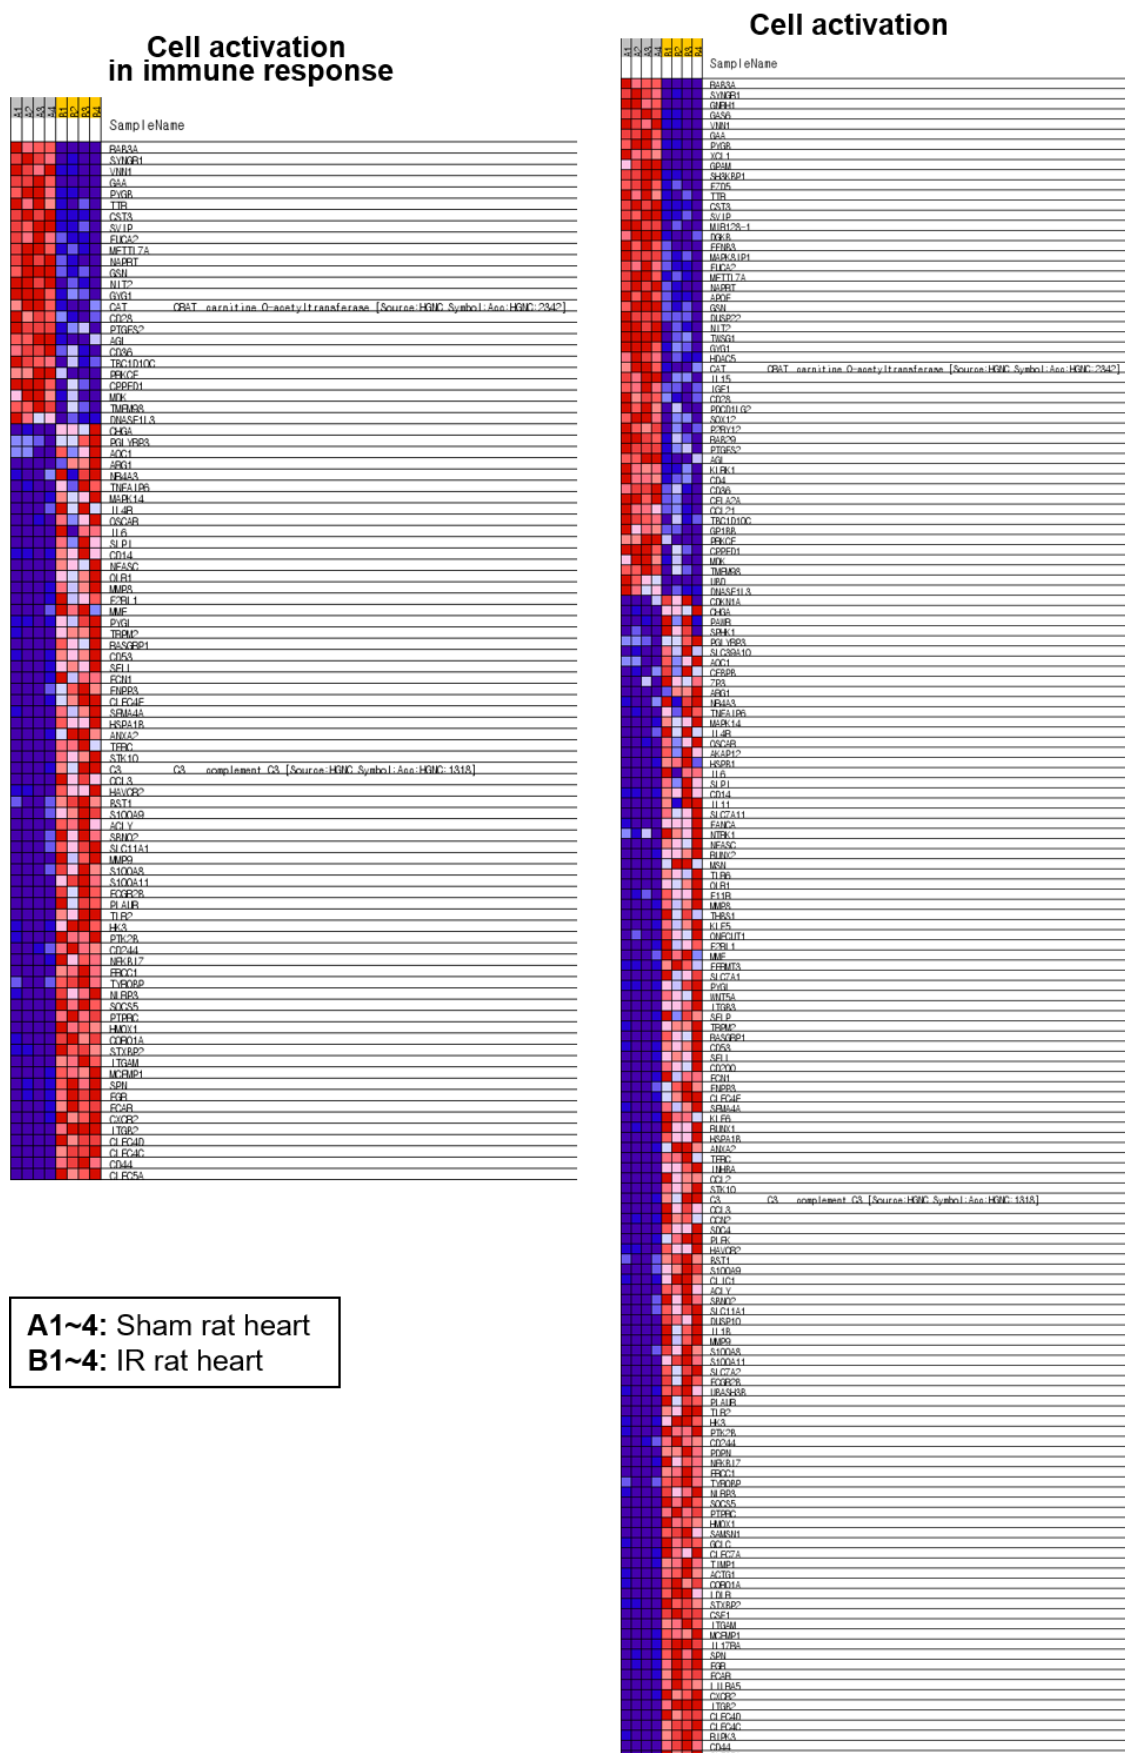

Supplement: s1 [file s1]
